# Supplementary material for: Section 14 StandAG – Identification of siting regions and associated challenges
Source: Copernicus journal article supplement (doi:10.5194/sand-1-49-2021), 2021-11-10
Supplement: Supplementary file 2 [file sand-1-49-2021-supplement.zip]

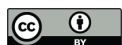

*Supplement of*

## **Section 14 StandAG – Identification of siting regions and associated challenges**

**Lisa Seidel and Marc Wengler**

*Correspondence to:* Lisa Seidel ([lisa.seidel@bge.de](mailto:lisa.seidel@bge.de))

The copyright of individual parts of the supplement might differ from the article licence.
